# Supplementary material
Source: PubMed Central journal article supplement (PMC11558519)
Supplement: MD-015-D4MD00281D-s001.pdf [file MD-015-D4MD00281D-s001.pdf]

## Supplementary Information

# Furoxan-Piplartine Hybrids as Effective NO Donors and ROS Inducers in PC3 Cancer Cells: Design, Synthesis, and Biological Evaluations

Carolyne B. Braga,<sup>1</sup> Julio C. Milan,<sup>1</sup> Matheus A. Meirelles,<sup>1</sup> Bruno Zavan,<sup>2</sup> Guilherme Álvaro Ferreira-Silva,<sup>2</sup> Ester Siqueira Caixeta,<sup>2</sup> Marisa Ionta,<sup>2</sup> and Ronaldo A. Pilli<sup>1\*</sup>

<sup>1</sup>*Department of Organic Chemistry, Institute of Chemistry, University of Campinas, UNICAMP, CEP 13083-970, Campinas, Sao Paulo, Brazil*

<sup>2</sup>*Institute of Biomedical Sciences, Federal University of Alfenas, UNIFAL-MG, 37130-001, Alfenas, Minas Gerais, Brazil.*

*\*E-mail address for correspondence: rapilli@unicamp.br*

| <b><u>Table of Contents</u></b>                                                | <b>Page</b> |
|--------------------------------------------------------------------------------|-------------|
| A. Characterization data of compounds                                          | S1 – S11    |
| A.1. <sup>1</sup> H- and <sup>13</sup> C-NMR spectra of compounds <b>4 – 9</b> | S1 – S6     |
| A.2. HRMS spectra of compounds <b>4 – 9</b>                                    | S7 – S9     |
| A.3. HPLC method conditions and chromatograms                                  | S10 – S11   |
| B. Biological assays                                                           | S12         |
| B.1. PCR data                                                                  | S12         |
| B.2. Western blot data                                                         | S12         |

## A. Characterization data of compounds

### A.1. <sup>1</sup>H- and <sup>13</sup>C-NMR spectra of compounds 4 – 9

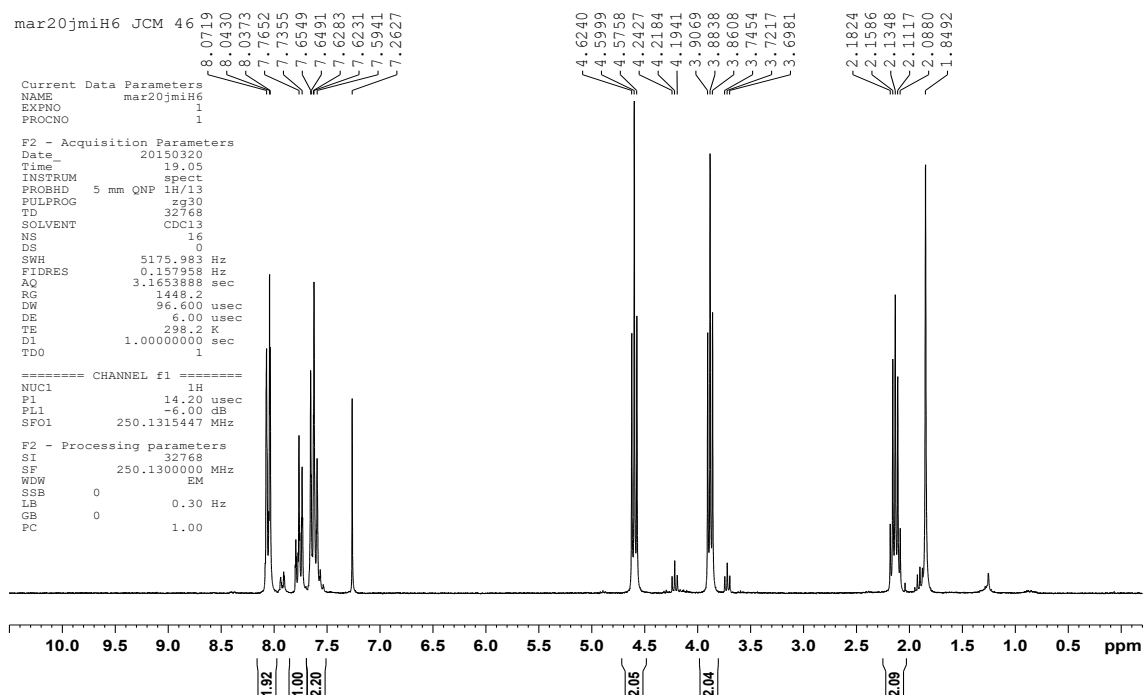

Figure S1. <sup>1</sup>H NMR spectrum of compound 4 (250 MHz, CDCl<sub>3</sub>, 298 K).

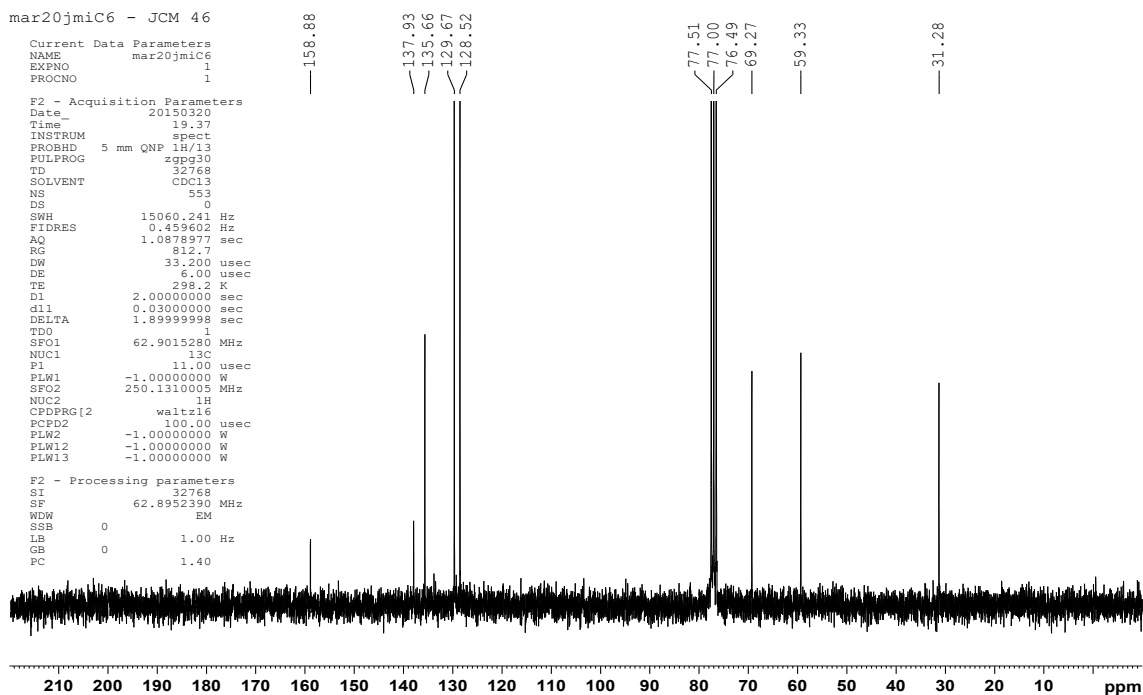

Figure S2. <sup>13</sup>C NMR spectrum of compound 4 (62.5 MHz, CDCl<sub>3</sub>, 298 K).

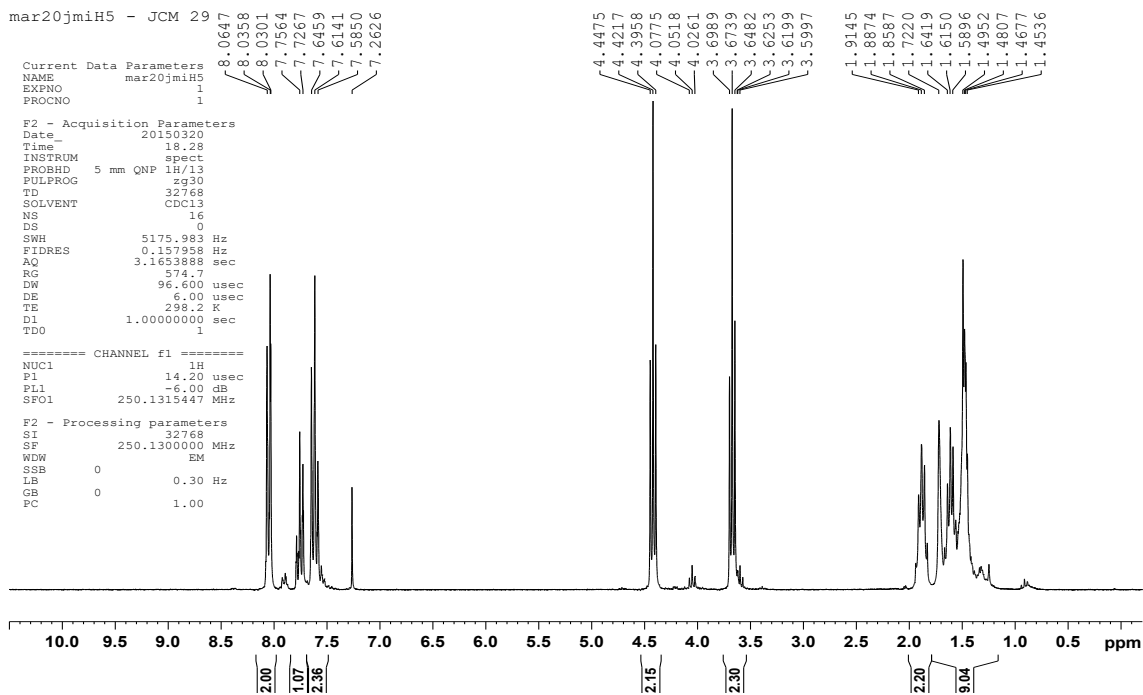

Figure S3.  $^1\text{H}$  NMR spectrum of compound **5** (250 MHz,  $\text{CDCl}_3$ , 298 K).

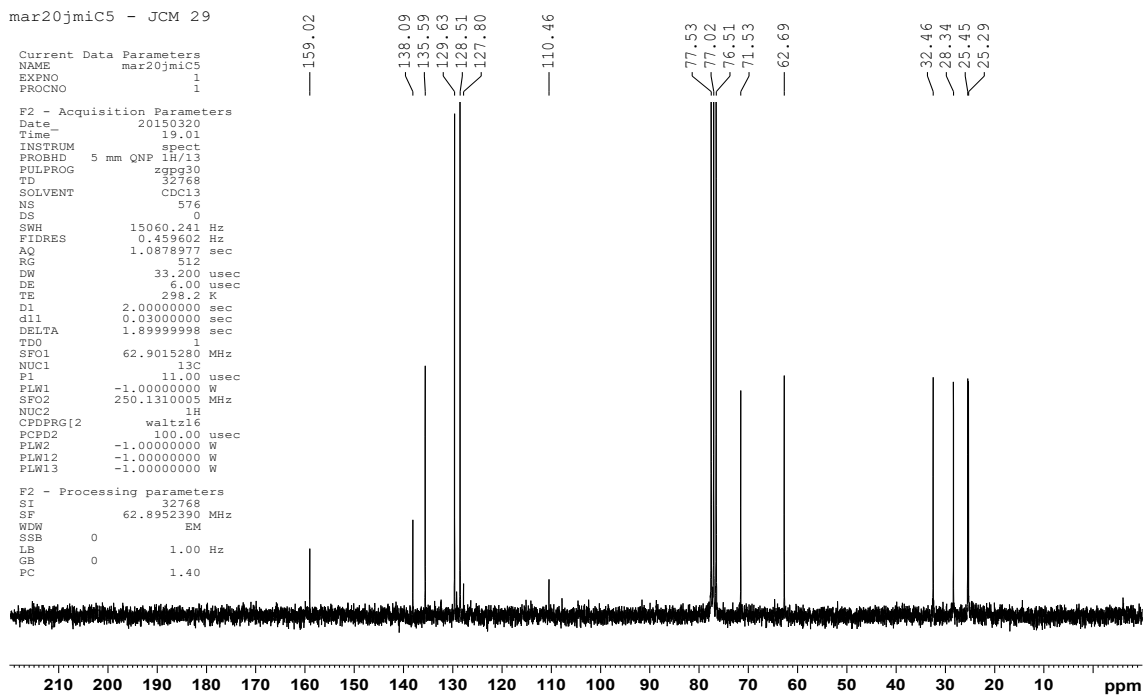

Figure S4.  $^{13}\text{C}$  NMR spectrum of compound **5** (62.5 MHz,  $\text{CDCl}_3$ , 298 K).

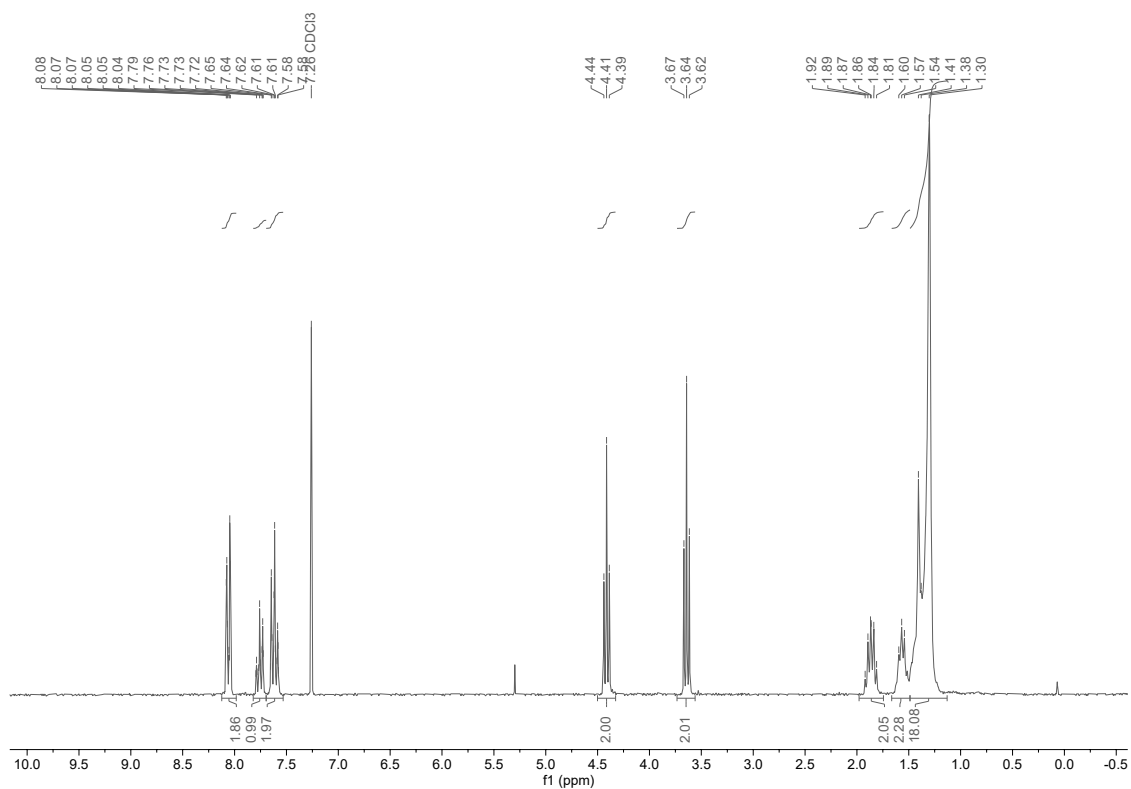

Figure S5.  $^1\text{H}$  NMR spectrum of compound **6** (250 MHz,  $\text{CDCl}_3$ , 298 K).

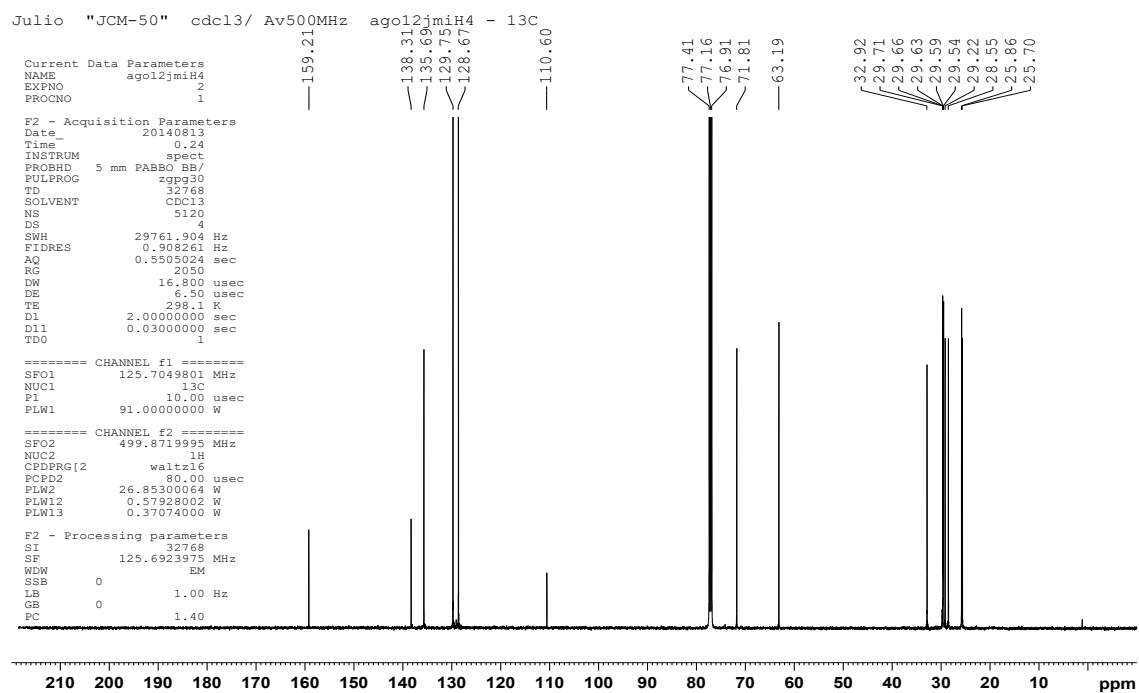

Figure S6.  $^{13}\text{C}$  NMR spectrum of compound **6** (125 MHz,  $\text{CDCl}_3$ , 298 K).

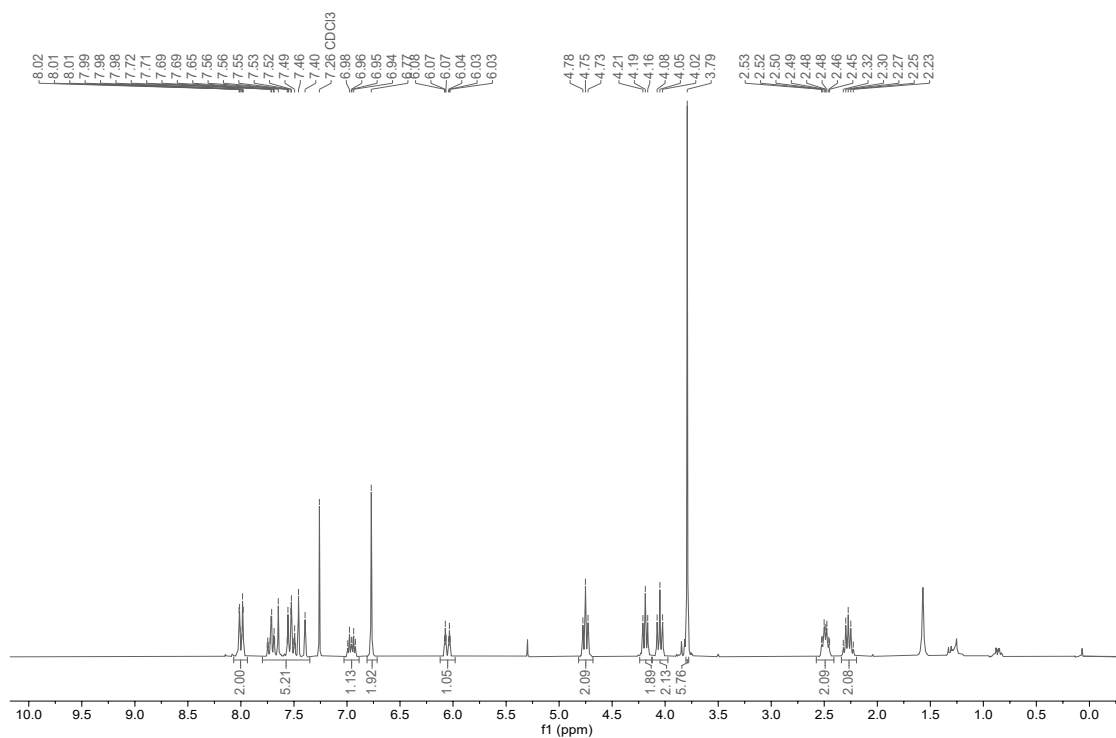

**Figure S7.** <sup>1</sup>H NMR spectrum of compound **7** (250 MHz, CDCl<sub>3</sub>, 298 K).

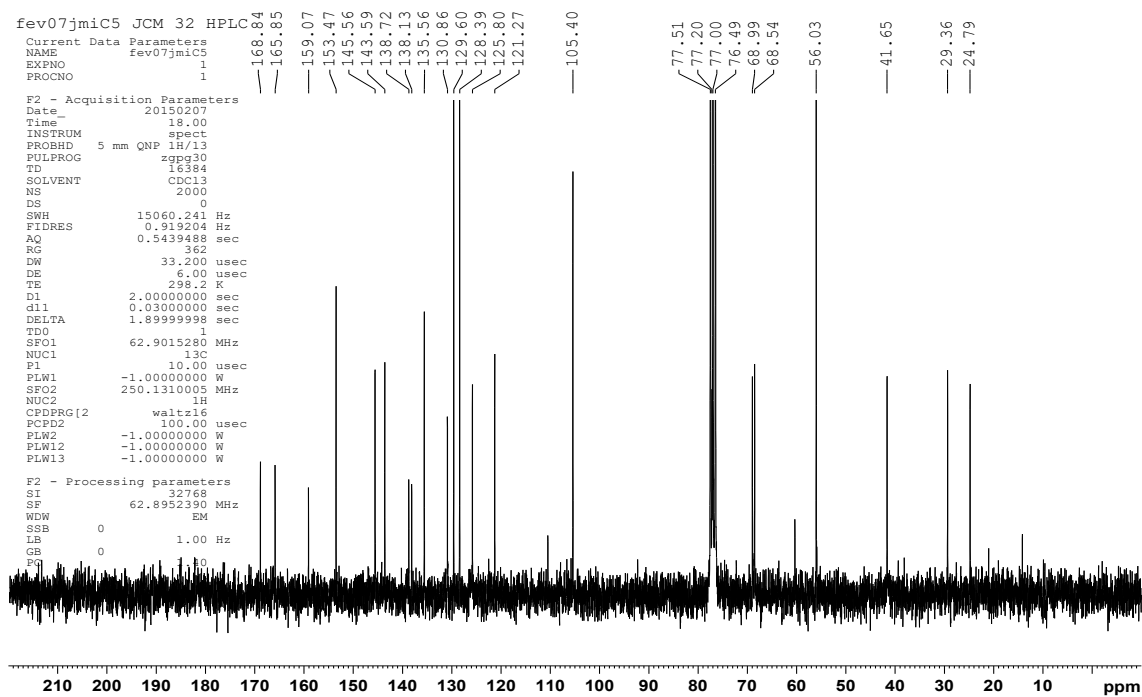

**Figure S8.** <sup>13</sup>C NMR spectrum of compound **7** (62.5 MHz, CDCl<sub>3</sub>, 298 K).

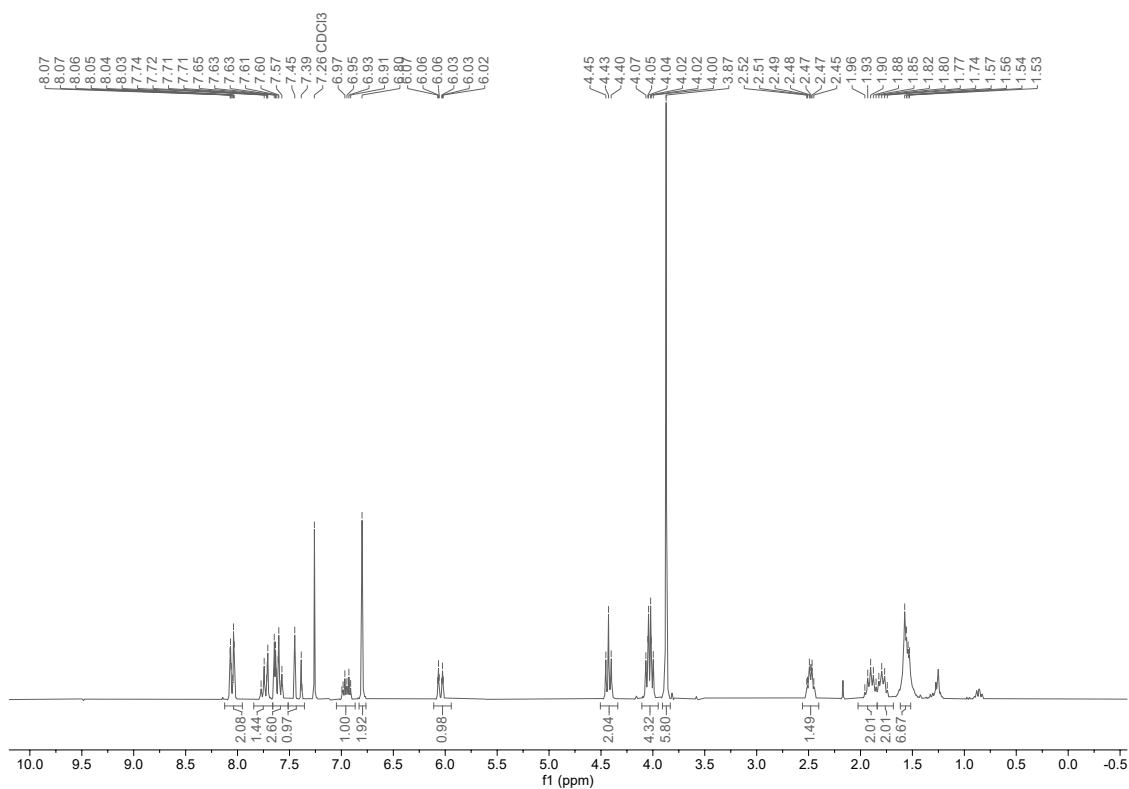

Figure S9. <sup>1</sup>H NMR spectrum of compound **8** (250 MHz, CDCl<sub>3</sub>, 298 K).

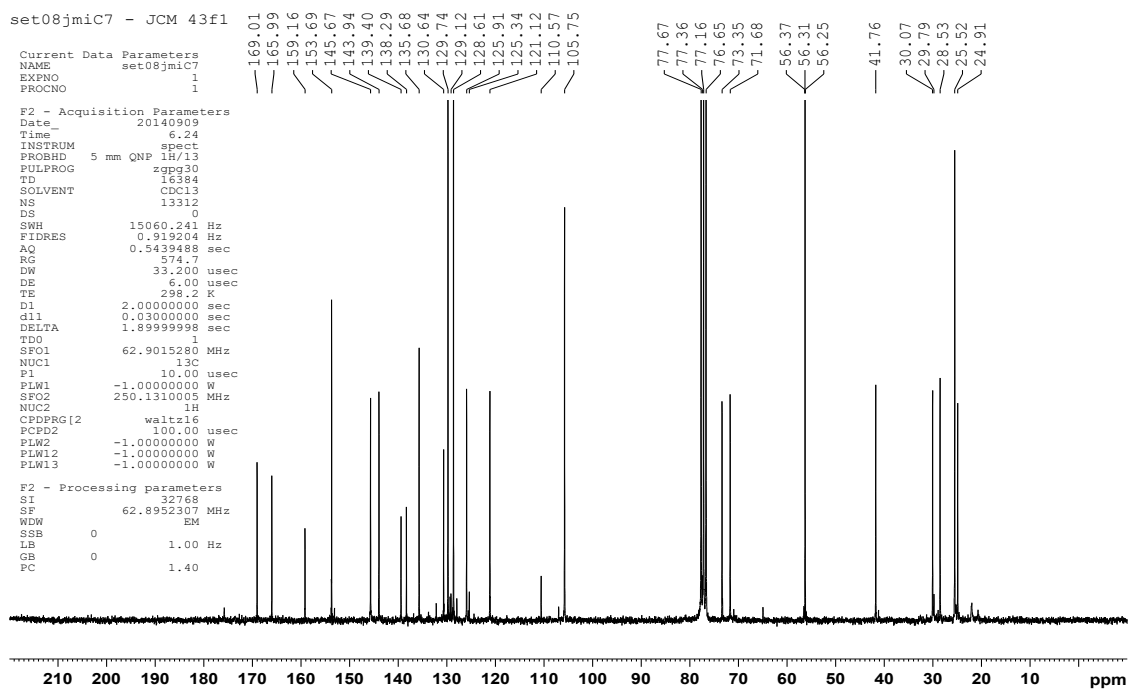

Figure S10. <sup>13</sup>C NMR spectrum of compound **8** (62.5 MHz, CDCl<sub>3</sub>, 298 K).

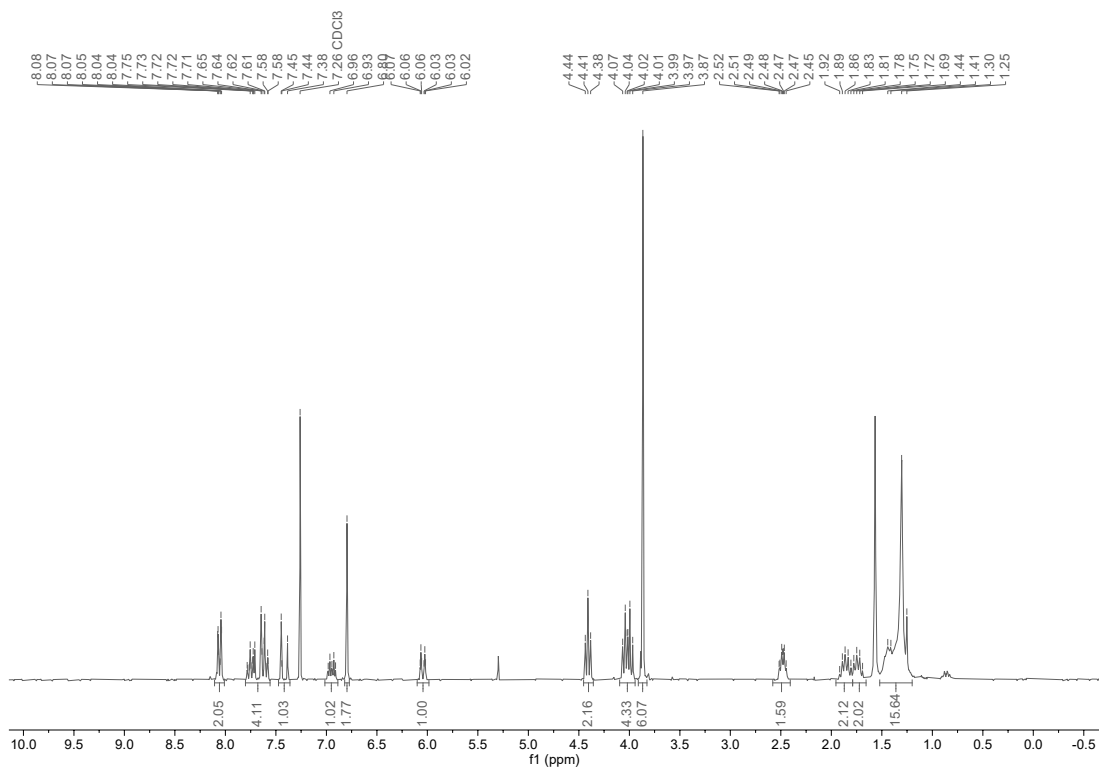

Figure S11.  $^1\text{H}$  NMR spectrum of compound **9** (250 MHz,  $\text{CDCl}_3$ , 298 K).

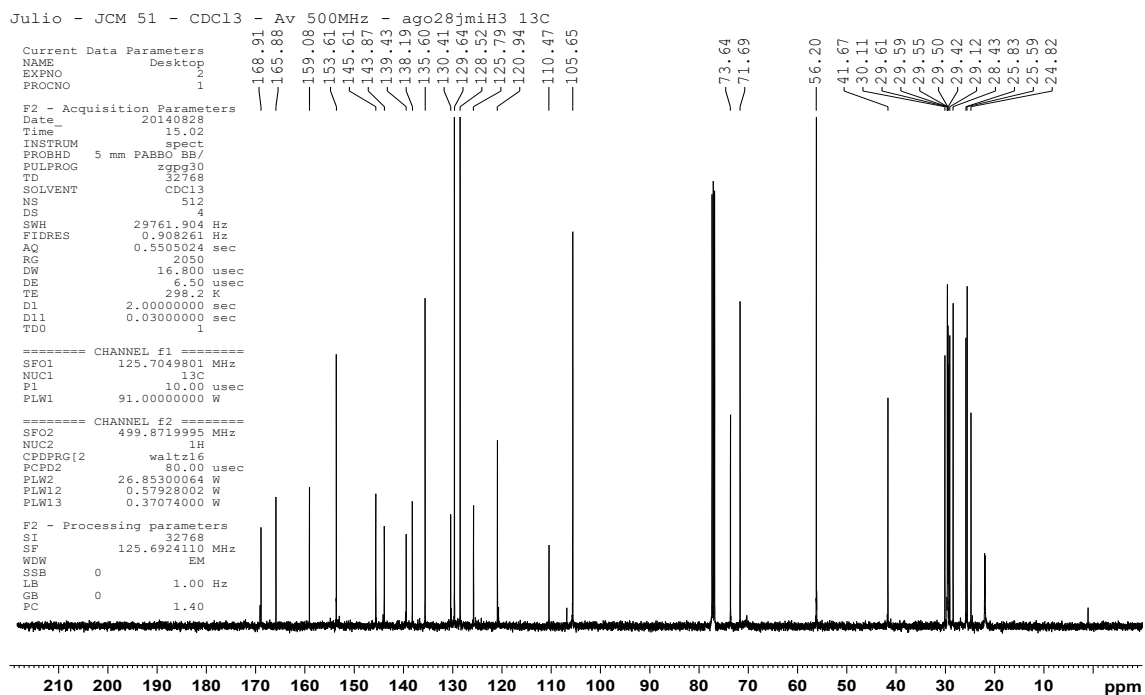

Figure S12.  $^{13}\text{C}$  NMR spectrum of compound **9** (125 MHz,  $\text{CDCl}_3$ , 298 K).

## A.2. HRMS spectra of compounds 4 – 9

JCM46 #118 RT: 1.33 AV: 1 NL: 4.40E6  
T: FTMS + p ESIFull ms [100.00-1000.00]

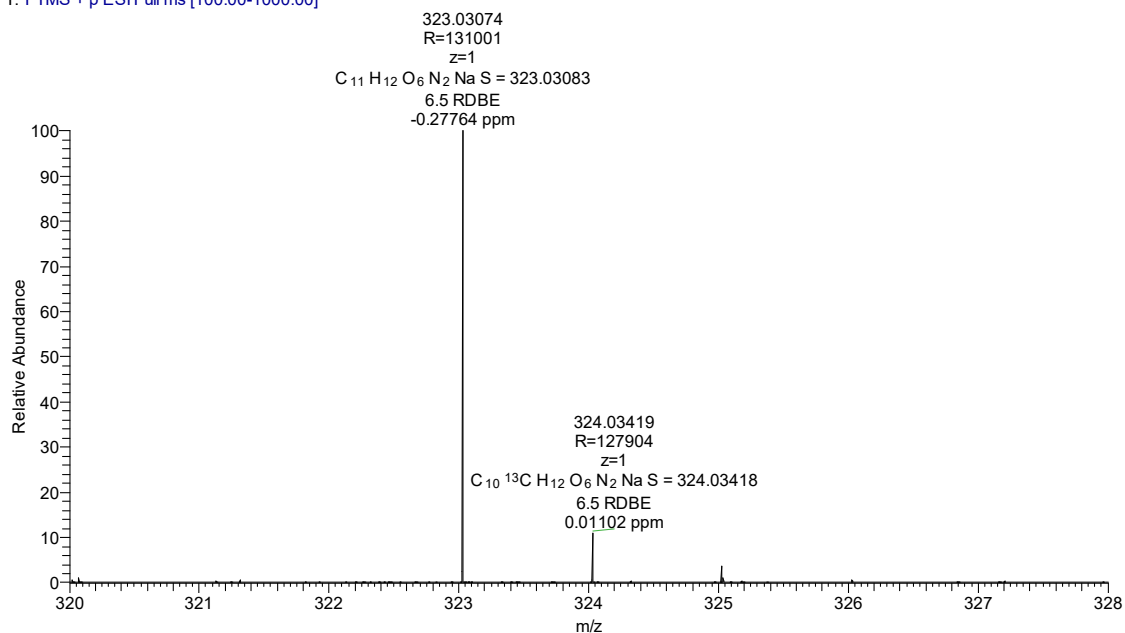

Figure S13. HRMS spectrum of compound 4.

JCM29 #65 RT: 0.76 AV: 1 NL: 3.67E6  
T: FTMS + p ESIFull ms [100.00-1000.00]

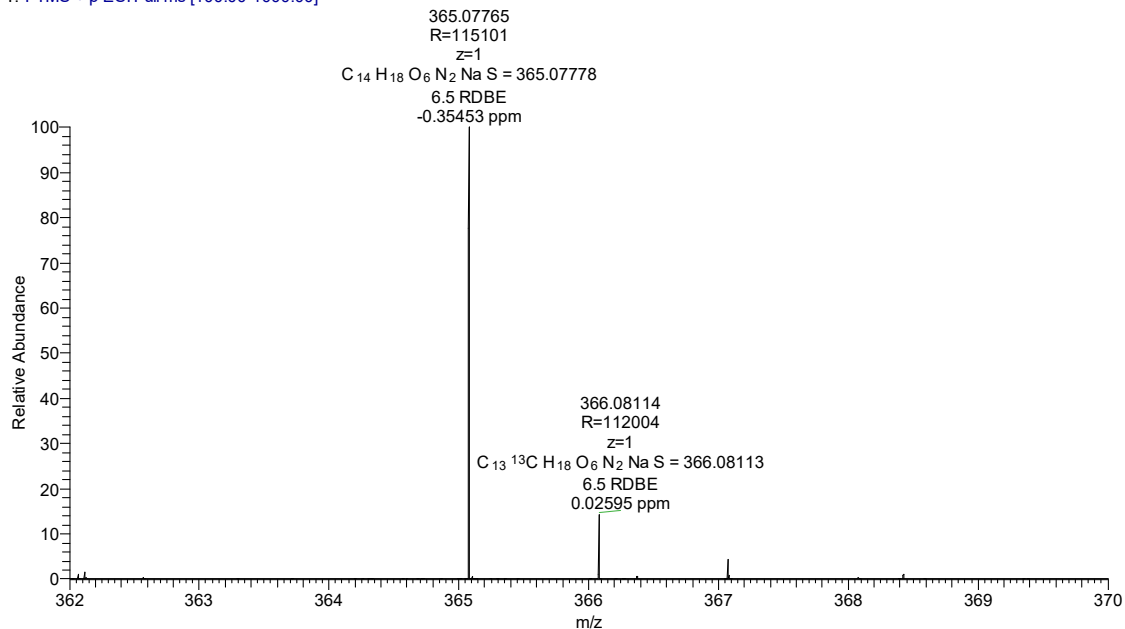

Figure S14. HRMS spectrum of compound 5.



JCM50 #158 RT: 1.70 AV: 1 NL: 2.15E7  
T: FTMS + p ESI Full ms [100.00-1000.00]

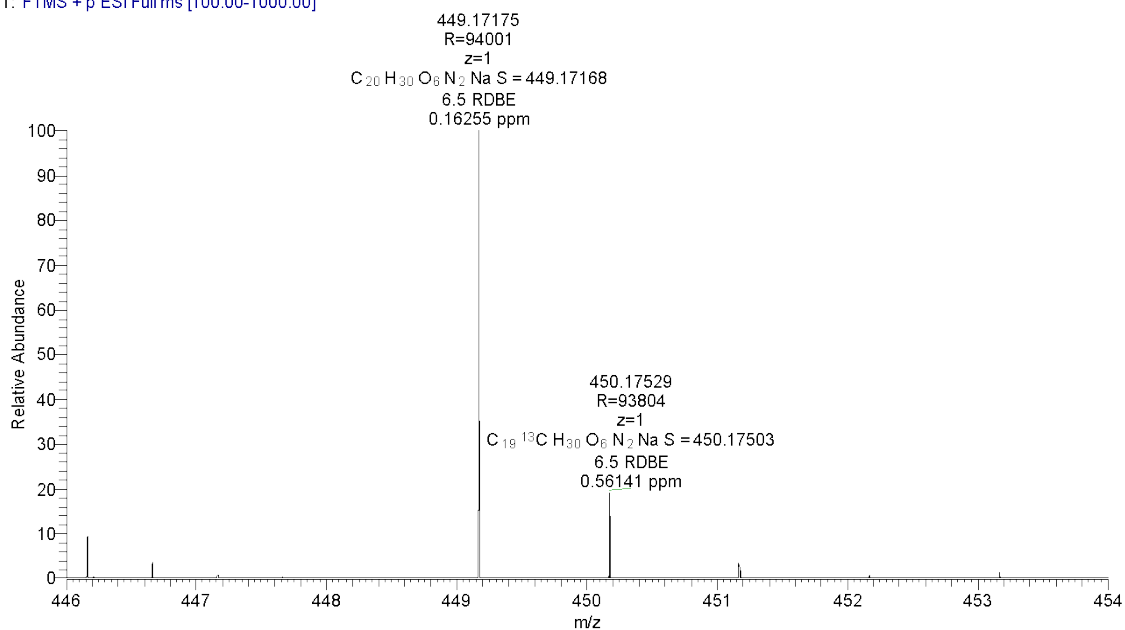

Figure S15. HRMS spectrum of compound 6.

JCM32 #15 RT: 0.22 AV: 1 NL: 1.94E7  
T: FTMS + p ESI Full ms [100.00-1000.00]

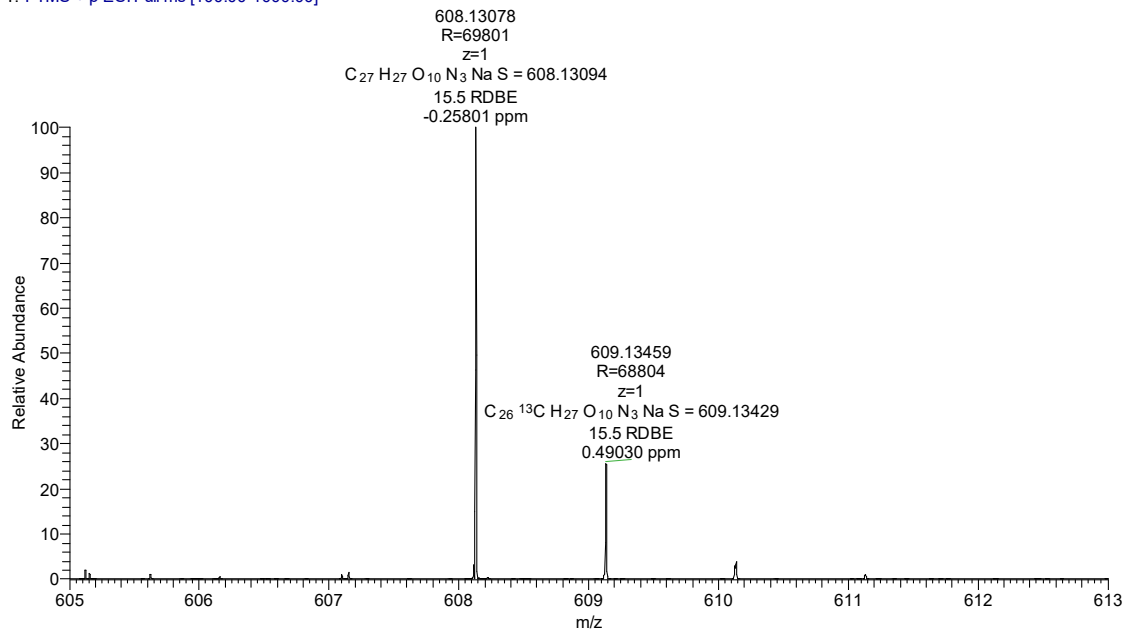

Figure S16. HRMS spectrum of compound 7.

JCM43 #67 RT: 0.71 AV: 1 NL: 1.00E8  
T: FTMS + p ESI Full ms [100.00-1000.00]

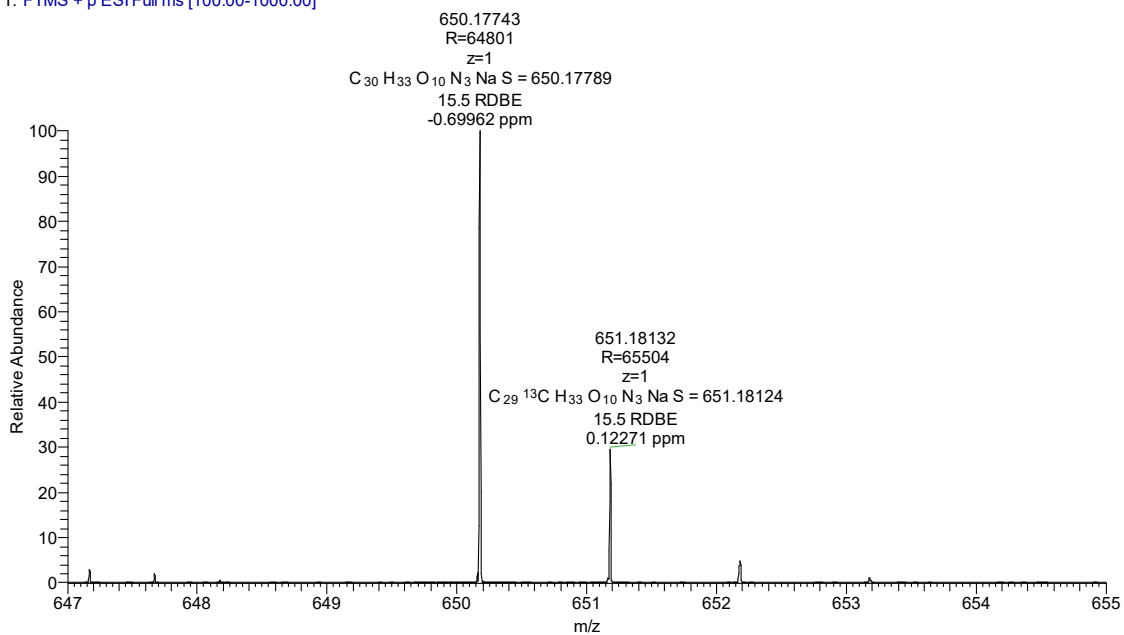

Figure S17. HRMS spectrum of compound 8.

JCM51 #64 RT: 0.73 AV: 1 NL: 9.71E7  
T: FTMS + p ESI Full ms [100.00-1000.00]

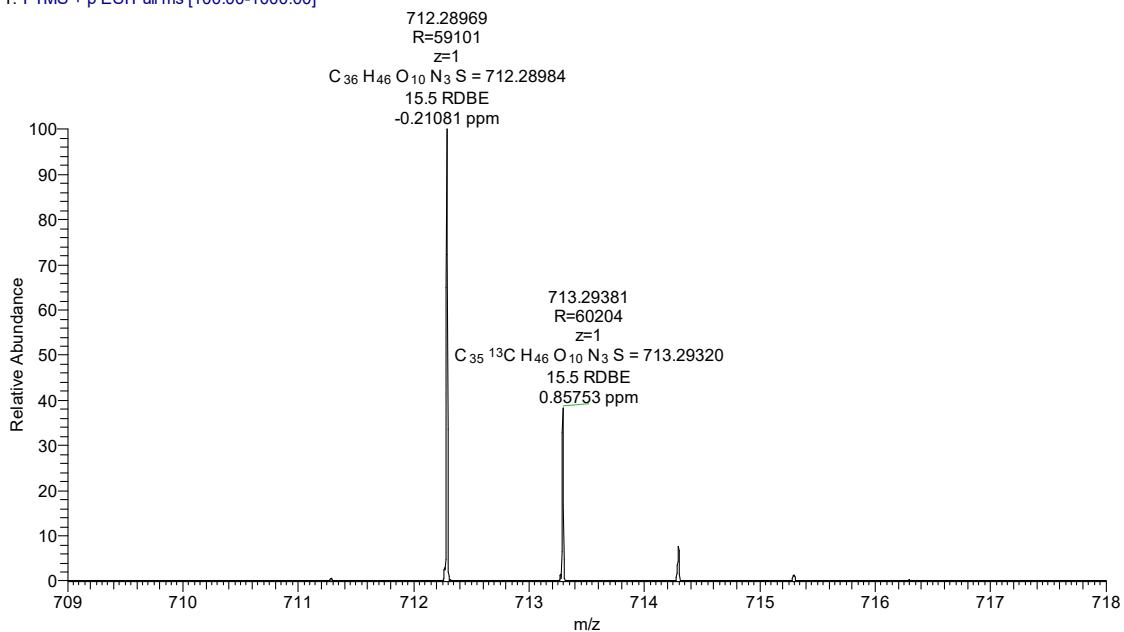

Figure S18. HRMS spectrum of compound 9.

### A.3. HPLC method conditions and chromatograms

- **Sample preparation:** The compounds were dissolved in DMSO (at 10 mM), and then diluted (1:10) in isopropanol.

- **Mobile Phase:** A) Hexane  
B) Isopropanol

- **Chromatographic conditions:**

System: Agilent 1260 Infinity

Column: Kromasil® SILICA, 5 $\mu$  4.6 mm x 250 mm

Column temperature: 25 °C

Flow rate: 1.0 mL/min

Injection volume: 10  $\mu$ L

Wavelength: 254 nm

- **Gradient program:**

| Time | %B |
|------|----|
| 0.1  | 10 |
| 10   | 10 |
| 45   | 50 |
| 50   | 90 |

- HPLC Chromatograms:

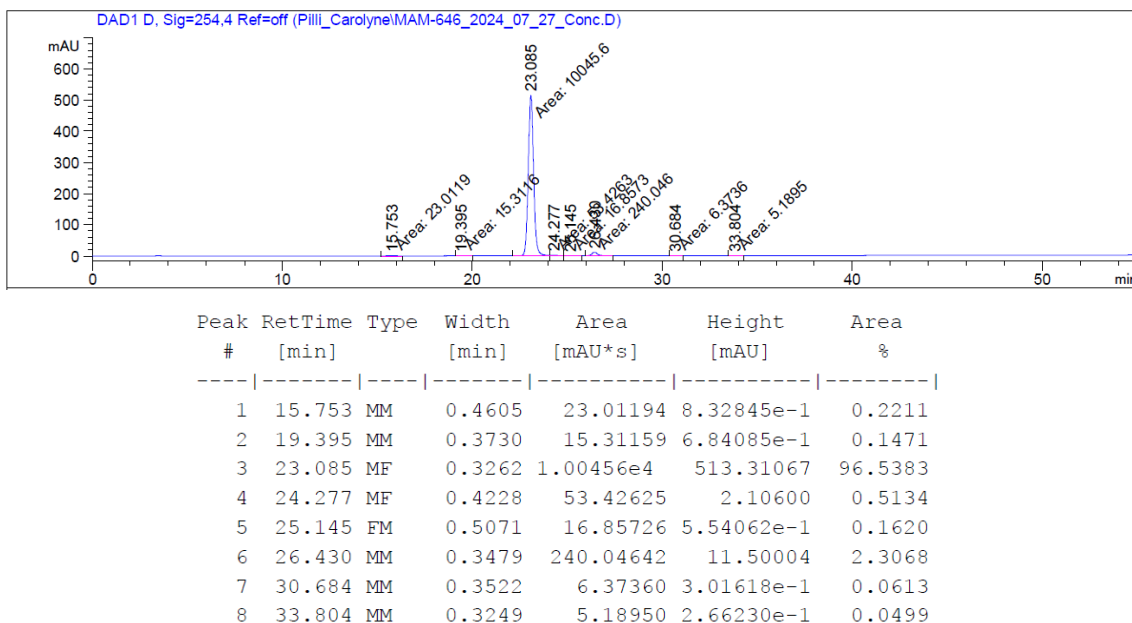

Figure S19. HPLC chromatogram of compound 7.

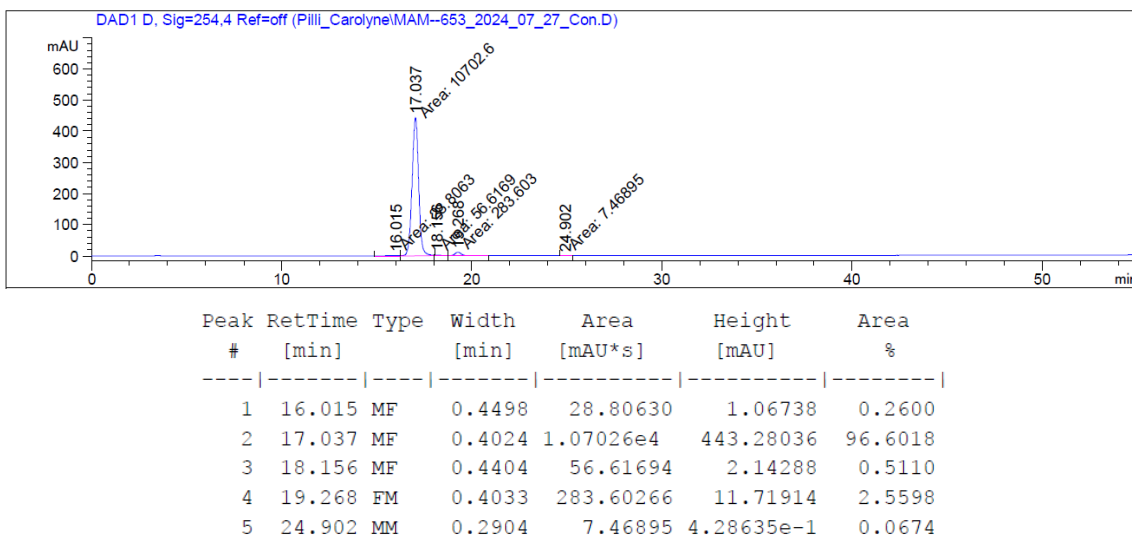

Figure S20. HPLC chromatogram of compound 9.

## B. Biological assays

### B.1. PCR data

**Table S1.** Sequences of the primers used for amplification in real-time PCR.

| Gene           | Sequence                                                                | Reference      |
|----------------|-------------------------------------------------------------------------|----------------|
| <i>c-MYC</i>   | F: 5' AAGCTGAGGCACACAAAGA3'<br>R: 5' GCTTGGACAGGTTAGGAGTAAA3'           | NM_001354870.1 |
| <i>CCND1</i>   | F 5'- CCATAGCCTCTACTGCCACCATC-3'<br>R 5'- GTCCAGCGACCTTCCTCATCCA-3'     | NM_001291549.1 |
| <i>CDKN1A</i>  | F 5'- CCATAGCCTCTACTGCCACCATC-3'<br>R 5'- GTCCAGCGACCTTCCTCATCCA-3'     | NM_001291549.1 |
| <i>NRF2</i>    | F 5'- CAATGAGGTTTCTTCGGCTACG -3'<br>R 5'- AAGACTGGGCTCTCGATGTG -3'      | NM_006164.4    |
| <i>BAX</i>     | F:5'- TTCCTTACGTGTCTGATCAATCC-3'<br>R:5'- GGGCAGAAGGCACTAATCAA -3'      | NM_004324.3    |
| <i>BCL-2</i>   | F:5'- CAGAAGTCTGGGAATCGATCTG -3'<br>R:5'- AATCTTCAGCACTCTCCAGTTATAG -3' | NM_000657.2    |
| <i>ACTB</i>    | F 5'- AGAGCTACGAGCTGCCTGAC-3'<br>R 5'- AGCACTGTGTTGGCGTACAG-3'          | NM_001101.3    |
| <i>GAPDH</i>   | F 5'- GGATTTGGTCGTATTGGGC-3'<br>R 5'- TGGAAGATGGTGATGGGATT-3'           | NM_002046.4    |
| <i>18srRNA</i> | F 5'- GTAACCCGTTGAACCCCAT-3'<br>R 5'- CCATCCAATCGGTAGTAGCG-3'           | HQ387008.1     |

F = forward primer; R = reverse primer.

### B.2. Western Blot data

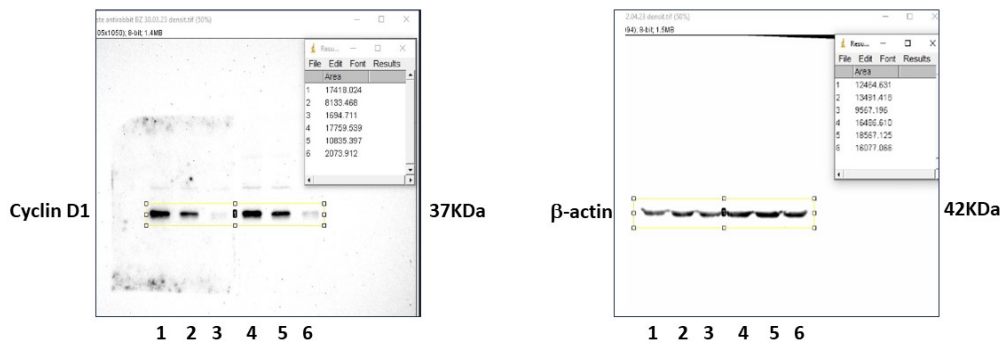

**Figure S21.** Protein expression of cyclin D determined by Western Blot.
